# Supplementary material for: Canonical A-to-I and C-to-U RNA Editing Is Enriched at 3′UTRs and microRNA Target Sites in Multiple Mouse Tissues
Source: PLoS One. 2012 Mar 20;7(3):e33720. doi: 10.1371/journal.pone.0033720 (PMC3308996; doi:10.1371/journal.pone.0033720)
Supplement: Table S3 — All high confidence canonical editing sites. (XLSX) [file pone.0033720.s010.xlsx]

## Sheet: most_confident_sites_infor
			Adipose Replicate 1			Adipose Replicate 2			Adipose Replicate 3			Bone Replicate 1			Bone Replicate 2			Bone Replicate 3			Liver Replicate 1			Liver Replicate 2			Liver Replicate 3
type	loci	gene	total	edited	ratio	total	edited	ratio	total	edited	ratio	total	edited	ratio	total	edited	ratio	total	edited	ratio	total	edited	ratio	total	edited	ratio	total	edited	ratio
ag	1:90114168:+	Ugt1a6b	NA	NA	NA	1	0	NA	2	0	NA	2	0	NA	1	0	NA	NA	NA	NA	12	4	0.333	12	4	0.333	6	2	0.333
ag	1:90156182:-	Heatr7b1	1	1	1	3	2	0.667	3	2	0.667	15	2	0.133	11	3	0.273	8	3	0.375	8	6	0.75	11	3	0.273	5	5	1
ag	1:135034121:+	Ppp1r15b	25	1	0.04	58	4	0.069	29	1	0.034	100	19	0.19	59	12	0.203	59	9	0.153	49	4	0.082	34	1	0.029	33	2	0.061
ag	1:135034138:+	Ppp1r15b	27	0	NA	55	3	0.055	27	2	0.074	84	5	0.06	40	3	0.075	59	4	0.068	44	1	0.023	45	3	0.067	32	2	0.062
ag	1:135034587:+	Ppp1r15b	7	1	0.143	15	1	0.067	8	1	0.125	19	6	0.316	24	12	0.5	15	7	0.467	5	1	0.2	12	4	0.333	6	2	0.333
ag	1:155609671:+	Rnasel	7	1	0.143	16	3	0.188	11	1	0.091	36	14	0.389	22	11	0.5	18	5	0.278	3	0	NA	NA	NA	NA	1	0	NA
ct	10:7487994:-	BC013529	97	14	0.144	201	17	0.085	152	8	0.053	38	0	NA	16	1	0.062	22	0	NA	34	3	0.088	30	4	0.133	31	1	0.032
ct	10:57235791:-	Serinc1	71	43	0.606	89	35	0.393	70	17	0.243	58	3	0.052	22	2	0.091	70	3	0.043	46	15	0.326	69	20	0.29	25	7	0.28
ag	10:57886405:+	Lims1	9	1	0.111	9	1	0.111	7	0	NA	47	3	0.064	18	2	0.111	36	2	0.056	3	0	NA	3	0	NA	NA	NA	NA
ag	10:87394452:+	Igf1	19	3	0.158	43	8	0.186	29	0	NA	3	1	0.333	10	5	0.5	1	0	NA	63	6	0.095	56	9	0.161	52	5	0.096
ct	10:96980535:+	Dcn	244	5	0.02	542	5	0.009	248	5	0.02	334	2	0.006	117	3	0.026	256	3	0.012	91	14	0.154	89	11	0.124	49	7	0.143
ct	10:96980575:+	Dcn	215	1	0.005	523	1	0.002	303	0	NA	319	1	0.003	97	0	NA	299	1	0.003	83	8	0.096	90	5	0.056	55	6	0.109
ct	10:96980667:+	Dcn	143	1	0.007	438	2	0.005	370	0	NA	286	0	NA	63	2	0.032	135	1	0.007	47	10	0.213	81	14	0.173	20	3	0.15
ag	10:128236489:+	Mmp19	14	0	NA	10	1	0.1	8	1	0.125	3	0	NA	NA	NA	NA	NA	NA	NA	19	6	0.316	11	2	0.182	10	2	0.2
ag	10:128237598:+	Mmp19	49	6	0.122	48	4	0.083	26	5	0.192	14	0	NA	7	0	NA	14	3	0.214	43	21	0.488	50	16	0.32	24	4	0.167
ag	10:128237625:+	Mmp19	46	9	0.196	39	2	0.051	18	3	0.167	11	1	0.091	2	0	NA	10	3	0.3	25	15	0.6	46	23	0.5	17	8	0.471
ag	10:128237628:+	Mmp19	43	10	0.233	35	2	0.057	17	2	0.118	9	0	NA	2	0	NA	9	1	0.111	22	12	0.545	45	25	0.556	15	9	0.6
ct	11:3032252:-	Sfi1	10	2	0.2	14	1	0.071	10	1	0.1	21	8	0.381	16	4	0.25	21	8	0.381	9	5	0.556	15	7	0.467	9	4	0.444
ag	11:3050403:-	Sfi1	14	14	1	13	12	0.923	52	51	0.981	NA	NA	NA	45	43	0.956	31	27	0.871	6	6	1	75	73	0.973	37	35	0.946
ag	11:3059802:-	Sfi1	4	4	1	13	13	1	14	13	0.929	6	6	1	1	1	1	14	13	0.929	10	9	0.9	6	6	1	8	7	0.875
ct	11:19963282:-	Actr2	2	1	0.5	4	1	0.25	NA	NA	NA	11	3	0.273	13	3	0.231	7	2	0.286	4	1	0.25	2	0	NA	2	1	0.5
ag	11:67011015:+	Myh2	NA	NA	NA	16	1	0.062	NA	NA	NA	37	12	0.324	21	5	0.238	19	5	0.263	NA	NA	NA	NA	NA	NA	NA	NA	NA
ag	11:74989846:-	Ovca2	10	2	0.2	5	2	0.4	13	4	0.308	14	8	0.571	5	3	0.6	9	5	0.556	1	0	NA	2	1	0.5	1	0	NA
ag	11:74989847:-	Ovca2	10	0	NA	5	1	0.2	12	1	0.083	14	4	0.286	5	3	0.6	9	2	0.222	1	0	NA	2	1	0.5	1	0	NA
ag	11:74989934:-	Ovca2	4	0	NA	13	1	0.077	8	1	0.125	16	3	0.188	16	5	0.312	6	2	0.333	6	4	0.667	3	0	NA	2	0	NA
ag	11:75114062:-	Rpa1	6	3	0.5	13	0	NA	11	1	0.091	52	10	0.192	29	8	0.276	44	5	0.114	4	0	NA	5	0	NA	6	0	NA
ag	11:75114079:-	Rpa1	4	4	1	13	9	0.692	14	9	0.643	45	6	0.133	23	3	0.13	28	4	0.143	3	2	0.667	3	3	1	6	6	1
ag	11:75114080:-	Rpa1	4	3	0.75	13	6	0.462	14	9	0.643	44	26	0.591	23	18	0.783	28	17	0.607	4	3	0.75	3	3	1	6	5	0.833
ag	11:75114086:-	Rpa1	8	0	NA	12	0	NA	12	0	NA	39	10	0.256	25	11	0.44	27	4	0.148	4	0	NA	5	0	NA	7	0	NA
ag	11:75114095:-	Rpa1	10	2	0.2	13	2	0.154	12	0	NA	41	18	0.439	33	22	0.667	29	12	0.414	5	2	0.4	7	3	0.429	4	1	0.25
ag	11:75114120:-	Rpa1	12	1	0.083	15	2	0.133	10	0	NA	52	8	0.154	54	9	0.167	60	10	0.167	7	4	0.571	8	2	0.25	4	1	0.25
ag	11:75114124:-	Rpa1	12	0	NA	15	2	0.133	12	0	NA	55	3	0.055	55	6	0.109	64	5	0.078	8	0	NA	8	0	NA	5	0	NA
ag	11:75114133:-	Rpa1	11	1	0.091	19	1	0.053	11	1	0.091	60	7	0.117	56	7	0.125	72	7	0.097	8	0	NA	7	1	0.143	5	0	NA
ag	11:75114502:-	Rpa1	14	3	0.214	11	1	0.091	12	4	0.333	74	8	0.108	67	8	0.119	43	4	0.093	11	2	0.182	6	3	0.5	3	2	0.667
ag	11:75114517:-	Rpa1	14	14	1	11	10	0.909	12	12	1	69	57	0.826	64	55	0.859	43	40	0.93	7	7	1	9	9	1	3	3	1
ag	11:75114534:-	Rpa1	8	0	NA	10	1	0.1	14	0	NA	58	13	0.224	47	7	0.149	36	7	0.194	6	3	0.5	9	1	0.111	1	0	NA
ag	11:75114542:-	Rpa1	10	1	0.1	10	2	0.2	14	0	NA	54	6	0.111	45	7	0.156	36	5	0.139	7	1	0.143	9	1	0.111	1	0	NA
ag	11:77333859:+	Abhd15	17	0	NA	39	2	0.051	22	0	NA	4	0	NA	8	0	NA	1	0	NA	19	2	0.105	18	4	0.222	14	2	0.143
ag	11:82776068:+	Slfn5	14	4	0.286	7	2	0.286	11	2	0.182	2	0	NA	17	4	0.235	6	2	0.333	NA	NA	NA	2	2	1	NA	NA	NA
ag	11:82776730:+	Slfn5	11	4	0.364	29	8	0.276	19	7	0.368	29	5	0.172	19	6	0.316	7	1	0.143	2	1	0.5	3	1	0.333	NA	NA	NA
ag	11:82776958:+	Slfn5	26	3	0.115	47	5	0.106	45	2	0.044	21	3	0.143	34	9	0.265	9	4	0.444	4	0	NA	7	4	0.571	1	0	NA
ag	11:82777136:+	Slfn5	22	2	0.091	68	4	0.059	36	3	0.083	21	1	0.048	30	3	0.1	17	1	0.059	5	0	NA	6	1	0.167	7	0	NA
ag	11:82777162:+	Slfn5	22	1	0.045	56	3	0.054	29	2	0.069	30	4	0.133	35	7	0.2	15	1	0.067	9	3	0.333	5	1	0.2	5	0	NA
ag	11:82777188:+	Slfn5	19	3	0.158	49	9	0.184	28	3	0.107	25	3	0.12	38	8	0.211	14	3	0.214	10	9	0.9	5	0	NA	2	0	NA
ag	11:120440405:-	Arhgdia	255	17	0.067	191	10	0.052	215	8	0.037	197	17	0.086	174	20	0.115	106	12	0.113	42	3	0.071	42	2	0.048	24	2	0.083
ct	12:8014860:+	Apob	NA	NA	NA	NA	NA	NA	1	1	1	NA	NA	NA	NA	NA	NA	NA	NA	NA	356	244	0.685	313	226	0.722	241	150	0.622
ag	12:8757075:+	Pum2	2	1	0.5	5	1	0.2	3	0	NA	9	4	0.444	7	5	0.714	8	2	0.25	3	2	0.667	NA	NA	NA	3	2	0.667
ag	12:72063017:+	Actr10	20	0	NA	31	2	0.065	33	0	NA	32	2	0.062	12	4	0.333	20	2	0.1	9	2	0.222	13	2	0.154	7	0	NA
ag	12:101445396:+	Calm1	155	3	0.019	187	4	0.021	120	1	0.008	233	14	0.06	174	17	0.098	138	9	0.065	74	5	0.068	63	2	0.032	47	2	0.043
ct	12:102988696:-	Fbln5	19	0	NA	15	0	NA	26	0	NA	23	3	0.13	16	2	0.125	26	2	0.077	4	0	NA	1	0	NA	2	0	NA
ag	12:105006081:-	Serpina1d	NA	NA	NA	NA	NA	NA	NA	NA	NA	NA	NA	NA	NA	NA	NA	NA	NA	NA	53	9	0.17	31	11	0.355	37	5	0.135
ag	13:4456592:+	Akr1c6	1	0	NA	NA	NA	NA	NA	NA	NA	NA	NA	NA	NA	NA	NA	NA	NA	NA	159	16	0.101	119	21	0.176	92	6	0.065
ag	14:8768562:+	Flnb	18	8	0.444	12	10	0.833	7	1	0.143	3	1	0.333	3	2	0.667	4	1	0.25	18	8	0.444	17	5	0.294	15	7	0.467
ct	14:22267280:+	Adk	39	0	NA	45	1	0.022	33	0	NA	24	0	NA	22	0	NA	13	1	0.077	210	12	0.057	328	26	0.079	111	9	0.081
ag	14:22616933:+	Samd8	6	1	0.167	11	5	0.455	12	2	0.167	3	0	NA	15	4	0.267	5	1	0.2	8	2	0.25	12	8	0.667	5	3	0.6
ag	14:31386780:+	Tkt	365	20	0.055	317	19	0.06	129	3	0.023	149	13	0.087	64	4	0.062	78	4	0.051	22	3	0.136	37	1	0.027	14	0	NA
ag	14:32513812:-	Ankrd28	5	0	NA	7	0	NA	4	0	NA	26	2	0.077	27	9	0.333	16	4	0.25	9	5	0.556	5	2	0.4	6	2	0.333
ag	14:32513815:-	Ankrd28	3	2	0.667	7	1	0.143	4	0	NA	29	2	0.069	25	3	0.12	18	4	0.222	9	8	0.889	7	2	0.286	5	1	0.2
ag	14:32513848:-	Ankrd28	3	0	NA	8	3	0.375	5	2	0.4	27	5	0.185	18	4	0.222	17	3	0.176	6	2	0.333	4	4	1	5	4	0.8
ag	14:32513849:-	Ankrd28	3	0	NA	8	3	0.375	5	0	NA	27	6	0.222	18	7	0.389	17	6	0.353	5	4	0.8	4	2	0.5	5	2	0.4
ag	14:32513851:-	Ankrd28	3	0	NA	7	1	0.143	5	0	NA	25	3	0.12	18	4	0.222	18	4	0.222	5	1	0.2	4	1	0.25	7	1	0.143
ag	14:32514109:-	Ankrd28	1	0	NA	10	0	NA	2	0	NA	31	2	0.065	25	4	0.16	23	2	0.087	11	0	NA	9	1	0.111	5	1	0.2
ag	14:47939648:+	Mapk1ip1l	9	1	0.111	16	2	0.125	4	1	0.25	16	6	0.375	14	7	0.5	15	4	0.267	16	6	0.375	7	2	0.286	16	5	0.312
ag	14:47939653:+	Mapk1ip1l	13	0	NA	23	2	0.087	4	0	NA	22	3	0.136	19	2	0.105	17	4	0.235	20	1	0.05	9	1	0.111	16	4	0.25
ag	14:47939654:+	Mapk1ip1l	14	0	NA	24	0	NA	4	0	NA	22	3	0.136	19	3	0.158	17	2	0.118	20	1	0.05	9	1	0.111	16	3	0.188
ag	14:52524962:-	Ndrg2	14	2	0.143	29	3	0.103	17	3	0.176	21	0	NA	8	0	NA	22	3	0.136	68	5	0.074	86	18	0.209	51	4	0.078
ag	14:52913904:+	Tox4	6	0	NA	13	2	0.154	12	3	0.25	30	6	0.2	26	11	0.423	18	5	0.278	10	5	0.5	6	2	0.333	5	2	0.4
ag	14:72939311:-	Fndc3a	19	2	0.105	50	4	0.08	49	5	0.102	34	2	0.059	29	3	0.103	15	1	0.067	48	3	0.062	40	4	0.1	19	2	0.105
ag	15:3230063:+	Sepp1	285	14	0.049	552	21	0.038	452	10	0.022	135	15	0.111	72	6	0.083	124	9	0.073	1475	58	0.039	1710	69	0.04	1079	31	0.029
ag	15:7135065:+	Lifr	NA	NA	NA	NA	NA	NA	2	1	0.5	NA	NA	NA	13	8	0.615	5	0	0	5	2	0.4	3	1	0.333	7	6	0.857
ct	15:11770747:-	Npr3	126	7	0.056	97	5	0.052	64	4	0.062	1	0	NA	3	0	NA	1	0	NA	1	0	NA	NA	NA	NA	NA	NA	NA
ag	15:38421367:-	Azin1	20	0	NA	41	2	0.049	35	3	0.086	185	21	0.114	134	35	0.261	143	16	0.112	62	5	0.081	79	6	0.076	47	3	0.064
ag	15:38421368:-	Azin1	19	0	NA	40	0	NA	31	1	0.032	182	11	0.06	127	20	0.157	142	13	0.092	62	2	0.032	76	3	0.039	47	3	0.064
ag	15:74592673:-	Ly6d	8	2	0.25	2	0	NA	2	0	NA	54	12	0.222	37	7	0.189	53	12	0.226	5	0	NA	19	1	0.053	10	0	NA
ag	15:79737977:+	Apobec3	4	2	0.5	5	2	0.4	2	0	NA	104	15	0.144	59	13	0.22	55	9	0.164	2	0	NA	NA	NA	NA	NA	NA	NA
ag	15:81649714:+	Tef	8	1	0.125	21	1	0.048	NA	NA	NA	15	7	0.467	20	5	0.25	15	6	0.4	17	5	0.294	11	6	0.545	11	3	0.273
ag	15:85293640:+	Atxn10	10	0	NA	17	5	0.294	7	0	NA	10	2	0.2	13	5	0.385	14	2	0.143	9	3	0.333	4	3	0.75	6	2	0.333
ag	16:18407622:-	Comt1	67	12	0.179	25	3	0.12	17	1	0.059	13	2	0.154	8	2	0.25	6	3	0.5	32	3	0.094	58	6	0.103	22	9	0.409
ag	16:20123821:+	Klhl24	18	6	0.333	38	6	0.158	36	7	0.194	38	5	0.132	17	2	0.118	16	1	0.062	29	8	0.276	33	8	0.242	12	3	0.25
ag	16:32300439:+	Rnf168	12	0	NA	6	0	NA	3	0	NA	22	2	0.091	22	4	0.182	14	3	0.214	6	0	NA	2	0	NA	8	0	NA
ag	16:37835850:+	Fstl1	22	3	0.136	32	5	0.156	35	12	0.343	25	1	0.04	33	0	NA	18	0	NA	1	0	NA	NA	NA	NA	4	0	NA
ct	16:70569593:+	Gbe1	30	4	0.133	48	7	0.146	8	3	0.375	6	0	NA	6	0	NA	6	0	NA	35	3	0.086	34	2	0.059	31	0	NA
ag	16:78337839:+	Cxadr	NA	NA	NA	1	1	1	4	0	NA	2	0	NA	32	12	0.375	NA	NA	NA	32	12	0.375	32	13	0.406	19	4	0.211
ct	16:84954758:-	App	22	2	0.091	30	4	0.133	44	5	0.114	25	0	NA	9	0	NA	9	2	0.222	7	3	0.429	5	0	NA	1	0	NA
ct	16:84955113:-	App	137	16	0.117	232	36	0.155	183	10	0.055	150	2	0.013	84	1	0.012	48	0	NA	22	1	0.045	38	0	NA	19	2	0.105
ag	16:98078815:-	C2cd2	4	0	NA	8	2	0.25	11	1	0.091	6	0	NA	3	1	0.333	6	1	0.167	10	4	0.4	16	7	0.438	7	2	0.286
ag	17:34065499:+	Tapbp	22	3	0.136	19	3	0.158	17	2	0.118	17	6	0.353	35	11	0.314	6	2	0.333	3	1	0.333	9	1	0.111	2	0	NA
ag	17:34065674:+	Tapbp	100	13	0.13	161	23	0.143	100	9	0.09	125	14	0.112	95	12	0.126	73	7	0.096	64	6	0.094	42	4	0.095	28	5	0.179
ag	17:34065678:+	Tapbp	100	15	0.15	164	18	0.11	114	8	0.07	126	16	0.127	96	13	0.135	72	6	0.083	68	8	0.118	53	5	0.094	28	2	0.071
ag	17:35201015:-	AU023871	2	0	NA	NA	NA	NA	NA	NA	NA	32	2	0.062	21	3	0.143	28	3	0.107	NA	NA	NA	1	0	NA	NA	NA	NA
ag	17:35611499:+	H2-Q10	14	1	0.071	7	0	NA	18	4	0.222	3	1	0.333	2	1	0.5	NA	NA	NA	55	14	0.255	71	18	0.254	41	5	0.122
ag	17:35994685:+	Mdc1	11	1	0.091	4	1	0.25	9	5	0.556	25	10	0.4	23	4	0.174	18	2	0.111	3	0	NA	2	1	0.5	1	1	1
ag	17:35995565:+	Mdc1	3	0	NA	3	0	NA	5	0	NA	61	9	0.148	25	7	0.28	12	3	0.25	4	0	NA	3	2	0.667	1	0	NA
ct	17:65929987:-	Vapa	11	3	0.273	10	3	0.3	1	0	NA	18	6	0.333	19	6	0.316	18	6	0.333	9	2	0.222	8	2	0.25	6	0	NA
ag	18:36914278:+	Ik	NA	NA	NA	NA	NA	NA	4	1	0.25	13	3	0.231	12	3	0.25	15	2	0.133	10	1	0.1	2	0	NA	2	0	NA
ag	18:44584357:+	Dcp2	7	2	0.286	9	5	0.556	12	0	NA	48	11	0.229	12	3	0.25	26	7	0.269	8	1	0.125	5	1	0.2	2	0	NA
ag	18:57116594:-	C330018D20Rik	3	2	0.667	7	3	0.429	5	4	0.8	1	0	NA	1	0	NA	1	0	NA	NA	NA	NA	5	3	0.6	2	2	1
ag	18:58837904:+	Isoc1	39	1	0.026	75	5	0.067	52	1	0.019	13	0	NA	14	1	0.071	9	0	NA	30	6	0.2	32	5	0.156	13	2	0.154
ag	18:64616516:-	Fech	4	0	NA	4	0	NA	3	0	NA	42	5	0.119	15	5	0.333	31	7	0.226	9	1	0.111	5	0	NA	5	0	NA
ag	18:64616550:-	Fech	1	0	NA	2	0	NA	1	0	NA	17	3	0.176	7	3	0.429	27	3	0.111	4	0	NA	2	0	NA	2	0	NA
ag	18:65636731:+	Malt1	10	2	0.2	15	8	0.533	6	1	0.167	12	2	0.167	14	10	0.714	8	2	0.25	1	1	1	4	0	NA	3	1	0.333
ag	18:67777626:-	Cep76	2	0	NA	5	0	NA	2	0	NA	53	6	0.113	13	3	0.231	15	2	0.133	2	0	NA	8	0	NA	1	0	NA
ag	18:67777630:-	Cep76	2	0	NA	5	0	NA	2	0	NA	54	13	0.241	15	6	0.4	15	3	0.2	2	0	NA	9	0	NA	1	0	NA
ag	18:67778390:-	Cep76	1	0	NA	4	0	NA	7	0	NA	37	2	0.054	7	2	0.286	21	3	0.143	2	0	NA	1	0	NA	1	0	NA
ag	19:7609740:+	Atl3	42	5	0.119	70	14	0.2	46	3	0.065	18	1	0.056	28	13	0.464	19	4	0.211	17	6	0.353	12	3	0.25	10	2	0.2
ag	19:7612605:+	Atl3	41	7	0.171	46	4	0.087	45	2	0.044	25	5	0.2	29	5	0.172	14	3	0.214	18	1	0.056	28	6	0.214	15	3	0.2
ag	19:10663128:+	Cybasc3	10	1	0.1	15	0	NA	6	0	NA	35	10	0.286	23	11	0.478	35	10	0.286	12	1	0.083	4	1	0.25	5	0	NA
ag	19:12538752:+	Mpeg1	21	3	0.143	25	2	0.08	26	1	0.038	208	20	0.096	160	24	0.15	129	16	0.124	48	6	0.125	42	6	0.143	34	7	0.206
ct	19:12539179:+	Mpeg1	17	1	0.059	25	1	0.04	14	0	NA	143	5	0.035	152	3	0.02	96	3	0.031	26	3	0.115	40	7	0.175	13	3	0.231
ag	19:34566881:-	Lipa	20	1	0.05	18	1	0.056	19	1	0.053	14	1	0.071	20	4	0.2	21	3	0.143	40	7	0.175	62	16	0.258	29	3	0.103
ct	19:44470080:-	Scd1	7999	443	0.055	8011	507	0.063	7894	433	0.055	248	7	0.028	193	5	0.026	112	1	0.009	3274	44	0.013	3188	37	0.012	3191	27	0.008
ct	19:44470182:-	Scd1	8007	1382	0.173	8012	1285	0.16	8003	1230	0.154	265	26	0.098	223	11	0.049	102	5	0.049	3607	223	0.062	3285	182	0.055	3439	184	0.054
ag	19:44470914:-	Scd1	8014	364	0.045	8015	537	0.067	8014	434	0.054	362	18	0.05	190	12	0.063	82	0	NA	3757	488	0.13	4105	555	0.135	2297	217	0.094
ag	19:46669649:+	Sfxn2	4	2	0.5	9	0	NA	5	0	NA	14	4	0.286	4	2	0.5	9	3	0.333	29	7	0.241	26	7	0.269	22	6	0.273
ag	19:46669665:+	Sfxn2	6	1	0.167	8	1	0.125	5	1	0.2	11	2	0.182	3	2	0.667	15	5	0.333	33	13	0.394	25	12	0.48	25	8	0.32
ag	19:47718623:+	Slk	9	0	NA	28	1	0.036	14	0	NA	54	5	0.093	33	2	0.061	30	3	0.1	12	0	NA	12	0	NA	5	0	NA
ag	2:6465802:-	Celf2	6	3	0.5	10	6	0.6	9	2	0.222	6	4	0.667	3	1	0.333	4	1	0.25	1	0	NA	NA	NA	NA	1	0	NA
ag	2:30886452:-	Fnbp1	9	0	0	13	4	0.308	13	6	0.462	16	2	0.125	1	1	1	12	5	0.417	4	2	0.5	6	4	0.667	4	2	0.5
ag	2:30886580:-	Fnbp1	16	1	0.062	18	1	0.056	20	5	0.25	34	3	0.088	NA	NA	NA	9	4	0.444	NA	NA	NA	22	6	0.273	NA	NA	NA
ag	2:84649829:+	Ube2l6	3	0	NA	6	1	0.167	2	0	NA	164	49	0.299	81	37	0.457	147	44	0.299	13	0	NA	10	1	0.1	3	0	NA
ag	2:90856027:+	Celf1	11	1	0.091	17	1	0.059	32	11	0.344	16	2	0.125	14	2	0.143	39	8	0.205	15	0	0	28	9	0.321	10	0	0
ag	2:119435817:-	Oip5	NA	NA	NA	NA	NA	NA	1	0	NA	16	4	0.25	12	7	0.583	15	4	0.267	1	1	1	NA	NA	NA	NA	NA	NA
ag	2:119435819:-	Oip5	NA	NA	NA	NA	NA	NA	1	0	NA	18	4	0.222	13	7	0.538	17	3	0.176	1	1	1	NA	NA	NA	NA	NA	NA
ag	2:121368998:+	Wdr76	2	0	NA	1	0	NA	2	1	0.5	20	10	0.5	12	7	0.583	15	4	0.267	NA	NA	NA	4	2	0.5	1	1	1
ag	2:121369374:+	Wdr76	2	0	NA	1	0	NA	NA	NA	NA	11	8	0.727	18	7	0.389	9	2	0.222	1	1	1	1	0	NA	1	0	NA
ag	2:121370130:+	Wdr76	1	0	NA	NA	NA	NA	NA	NA	NA	10	6	0.6	5	2	0.4	5	2	0.4	NA	NA	NA	1	0	NA	NA	NA	NA
ct	2:121978476:+	Patl2	669	35	0.052	1074	44	0.041	566	20	0.035	402	21	0.052	132	14	0.106	348	20	0.057	438	8	0.018	484	10	0.021	250	6	0.024
ct	2:121978523:+	Patl2	658	93	0.141	1261	181	0.144	471	38	0.081	549	25	0.046	394	14	0.036	447	13	0.029	654	27	0.041	686	27	0.039	448	13	0.029
ct	2:121978540:+	Patl2	601	108	0.18	1182	195	0.165	413	43	0.104	508	17	0.033	395	12	0.03	463	12	0.026	589	10	0.017	646	21	0.033	442	13	0.029
ct	2:121978638:+	Patl2	661	122	0.185	1415	254	0.18	974	136	0.14	783	70	0.089	160	11	0.069	367	26	0.071	769	71	0.092	809	75	0.093	334	27	0.081
ag	2:126717200:-	2010106G01Rik	5	4	0.8	4	2	0.5	3	2	0.667	14	5	0.357	19	14	0.737	7	7	1	9	8	0.889	10	5	0.5	8	2	0.25
ag	2:126717202:-	2010106G01Rik	4	1	0.25	4	0	NA	3	0	NA	12	3	0.25	19	1	0.053	7	0	NA	9	2	0.222	10	3	0.3	8	2	0.25
ag	2:126717207:-	2010106G01Rik	3	1	0.333	4	2	0.5	2	0	NA	13	6	0.462	20	6	0.3	7	3	0.429	7	7	1	10	4	0.4	6	1	0.167
ag	2:126717253:-	2010106G01Rik	5	1	0.2	2	0	NA	3	2	0.667	12	5	0.417	10	5	0.5	6	1	0.167	5	5	1	7	5	0.714	6	6	1
ag	2:132135369:+	Cds2	13	4	0.308	22	8	0.364	23	8	0.348	24	6	0.25	34	14	0.412	22	9	0.409	25	12	0.48	28	13	0.464	18	9	0.5
ag	2:132135370:+	Cds2	13	0	NA	21	1	0.048	24	1	0.042	23	3	0.13	35	0	NA	22	2	0.091	24	4	0.167	30	2	0.067	18	1	0.056
ag	2:132135391:+	Cds2	16	5	0.312	23	4	0.174	24	7	0.292	24	12	0.5	27	15	0.556	23	6	0.261	17	12	0.706	26	9	0.346	14	5	0.357
ag	2:132135392:+	Cds2	15	3	0.2	22	4	0.182	21	5	0.238	24	6	0.25	23	3	0.13	21	2	0.095	17	2	0.118	23	1	0.043	14	1	0.071
ag	2:132135405:+	Cds2	12	2	0.167	21	2	0.095	20	6	0.3	22	10	0.455	23	7	0.304	18	4	0.222	16	9	0.562	22	7	0.318	8	2	0.25
ag	2:132135609:+	Cds2	20	2	0.1	21	3	0.143	26	2	0.077	30	2	0.067	17	2	0.118	12	0	NA	9	1	0.111	17	0	NA	11	1	0.091
ag	2:132135616:+	Cds2	24	19	0.792	24	19	0.792	21	15	0.714	29	17	0.586	20	17	0.85	14	7	0.5	11	8	0.727	20	13	0.65	10	7	0.7
ag	2:132135620:+	Cds2	22	2	0.091	26	3	0.115	20	4	0.2	32	4	0.125	20	1	0.05	16	0	NA	11	1	0.091	22	1	0.045	10	1	0.1
ag	2:132136442:+	Cds2	9	2	0.222	12	0	NA	11	0	NA	30	2	0.067	13	2	0.154	11	2	0.182	14	1	0.071	16	1	0.062	7	1	0.143
ag	2:164251391:-	Sdc4	4	0	NA	8	0	NA	8	0	NA	13	1	0.077	14	0	NA	10	0	NA	102	8	0.078	78	6	0.077	76	6	0.079
ag	2:181250111:+	Tpd52l2	38	3	0.079	42	0	NA	34	0	NA	37	2	0.054	29	4	0.138	38	2	0.053	14	1	0.071	24	3	0.125	9	0	NA
ag	3:10206053:-	Fabp4	8003	311	0.039	8005	20	0.002	8003	237	0.03	692	90	0.13	197	36	0.183	315	48	0.152	19	1	0.053	18	2	0.111	14	3	0.214
ag	3:16114946:+	Ythdf3	15	0	NA	29	0	NA	21	0	NA	19	3	0.158	9	2	0.222	14	3	0.214	12	0	NA	22	0	NA	6	0	NA
ct	3:57638992:+	Rnf13	8	1	0.125	12	1	0.083	8	1	0.125	8	1	0.125	3	0	NA	NA	NA	NA	14	2	0.143	16	3	0.188	6	2	0.333
ag	3:58394745:+	2810407C02Rik	38	2	0.053	51	9	0.176	28	3	0.107	35	9	0.257	50	22	0.44	38	3	0.079	30	13	0.433	28	7	0.25	17	6	0.353
ag	3:68876636:-	Kpna4	11	0	NA	37	3	0.081	5	1	0.2	33	2	0.061	14	3	0.214	26	2	0.077	4	0	NA	6	1	0.167	3	0	NA
ct	3:73441472:-	Bche	13	8	0.615	24	13	0.542	4	2	0.5	NA	NA	NA	NA	NA	NA	NA	NA	NA	24	1	0.042	22	4	0.182	16	1	0.062
ct	3:73442586:-	Bche	33	2	0.061	63	0	NA	16	0	NA	NA	NA	NA	NA	NA	NA	NA	NA	NA	34	4	0.118	41	4	0.098	28	2	0.071
ag	3:87725373:+	Mrpl24	4	2	0.5	10	5	0.5	13	1	0.077	7	2	0.286	4	0	0	12	3	0.25	4	0	0	4	0	0	NA	NA	NA
ag	3:94987425:-	Gabpb2	14	3	0.214	10	1	0.1	9	0	NA	42	6	0.143	34	7	0.206	34	8	0.235	2	0	NA	7	1	0.143	3	1	0.333
ag	3:94987483:-	Gabpb2	10	5	0.5	11	2	0.182	2	0	NA	29	9	0.31	25	8	0.32	33	7	0.212	5	0	NA	5	1	0.2	2	0	NA
ag	3:94987863:-	Gabpb2	6	1	0.167	1	0	NA	1	0	NA	5	2	0.4	25	12	0.48	15	4	0.267	2	0	NA	NA	NA	NA	1	1	1
ag	3:96428238:+	6330549D23Rik	12	3	0.25	24	15	0.625	12	4	0.333	8	2	0.25	11	2	0.182	7	0	NA	2	0	NA	3	2	0.667	2	1	0.5
ct	3:97455909:+	Fmo5	8	1	0.125	8	0	NA	3	0	NA	3	0	NA	1	1	1	1	0	NA	138	11	0.08	77	4	0.052	119	7	0.059
ag	3:102870013:+	Nras	15	3	0.2	28	10	0.357	15	8	0.533	16	4	0.25	69	28	0.406	15	4	0.267	6	2	0.333	6	2	0.333	3	0	NA
ag	3:116447002:-	Agl	3	0	NA	14	2	0.143	20	6	0.3	6	1	0.167	8	1	0.125	8	2	0.25	4	2	0.5	7	4	0.571	3	2	0.667
ag	3:116447015:-	Agl	3	2	0.667	19	3	0.158	18	6	0.333	7	1	0.143	9	3	0.333	5	0	NA	3	3	1	8	4	0.5	3	2	0.667
ag	3:116447599:-	Agl	5	3	0.6	40	4	0.1	29	2	0.069	26	2	0.077	21	1	0.048	20	2	0.1	3	2	0.667	8	0	NA	4	1	0.25
ag	4:8534651:+	Rab2a	43	1	0.023	36	0	NA	25	0	NA	40	1	0.025	41	2	0.049	43	1	0.023	26	2	0.077	38	3	0.079	22	2	0.091
ag	4:44049700:-	Gne	5	1	0.2	5	1	0.2	6	2	0.333	3	1	0.333	2	0	NA	4	0	NA	12	3	0.25	18	4	0.222	7	3	0.429
ag	4:107903481:-	Zyg11b	5	0	NA	43	2	0.047	11	0	NA	15	1	0.067	22	0	NA	6	0	NA	12	2	0.167	18	2	0.111	11	3	0.273
ag	4:107903541:-	Zyg11b	12	0	NA	49	7	0.143	11	2	0.182	15	3	0.2	15	4	0.267	3	0	NA	17	3	0.176	18	5	0.278	6	2	0.333
ag	4:109126655:-	Rnf11	81	0	NA	123	1	0.008	85	3	0.035	94	11	0.117	59	13	0.22	86	11	0.128	48	2	0.042	32	2	0.062	38	0	NA
ag	4:116225489:-	Tmem69	2	1	0.5	5	1	0.2	1	0	NA	3	2	0.667	6	3	0.5	3	2	0.667	NA	NA	NA	8	4	0.5	NA	NA	NA
ag	4:128987135:-	Rbbp4	25	2	0.08	23	1	0.043	20	1	0.05	74	27	0.365	37	14	0.378	33	8	0.242	2	0	NA	15	3	0.2	4	0	NA
ag	4:128987228:-	Rbbp4	61	10	0.164	93	11	0.118	69	9	0.13	285	109	0.382	93	41	0.441	110	35	0.318	49	13	0.265	70	7	0.1	48	9	0.188
ag	4:128987230:-	Rbbp4	60	2	0.033	91	4	0.044	71	2	0.028	279	52	0.186	92	27	0.293	102	10	0.098	48	5	0.104	68	4	0.059	47	6	0.128
ag	4:128987231:-	Rbbp4	60	2	0.033	91	3	0.033	71	3	0.042	281	37	0.132	91	12	0.132	101	10	0.099	48	3	0.062	68	2	0.029	46	3	0.065
ag	4:131480362:-	Epb4.1	16	3	0.188	25	1	0.04	24	2	0.083	353	59	0.167	339	90	0.265	183	28	0.153	17	0	NA	43	1	0.023	16	0	NA
ag	4:132556435:+	Fgr	1	1	1	NA	NA	NA	1	0	NA	67	4	0.06	46	3	0.065	53	3	0.057	1	0	NA	2	0	NA	3	0	NA
ag	4:140507527:+	Padi2	2	1	0.5	3	1	0.333	4	0	NA	20	4	0.2	24	9	0.375	13	5	0.385	NA	NA	NA	NA	NA	NA	NA	NA	NA
ag	4:154996013:+	Slc35e2	NA	NA	NA	NA	NA	NA	1	0	NA	9	2	0.222	12	1	0.083	6	0	NA	7	2	0.286	16	3	0.188	4	2	0.5
ag	4:155384775:+	Sdf4	9	2	0.222	10	5	0.5	11	5	0.455	7	3	0.429	12	7	0.583	7	2	0.286	7	2	0.286	11	3	0.273	5	4	0.8
ct	5:17288955:-	Cd36	215	123	0.572	357	174	0.487	193	55	0.285	21	1	0.048	10	1	0.1	21	2	0.095	12	1	0.083	16	4	0.25	16	2	0.125
ag	5:77836756:-	Igfbp7	108	72	0.667	107	67	0.626	55	32	0.582	46	40	0.87	10	9	0.9	36	35	0.972	43	42	0.977	20	19	0.95	23	23	1
ag	5:77836808:-	Igfbp7	79	49	0.62	52	31	0.596	44	23	0.523	16	16	1	5	5	1	8	8	1	23	22	0.957	8	8	1	7	7	1
ag	5:87440912:+	Ugt2b35	NA	NA	NA	NA	NA	NA	NA	NA	NA	NA	NA	NA	NA	NA	NA	NA	NA	NA	68	9	0.132	58	6	0.103	24	3	0.125
ct	5:88949750:-	Igj	1	0	NA	3	0	NA	NA	NA	NA	59	8	0.136	26	4	0.154	19	2	0.105	1	0	NA	NA	NA	NA	NA	NA	NA
ct	5:90889926:+	Alb	2	0	NA	1	0	NA	1	0	NA	1	0	NA	NA	NA	NA	NA	NA	NA	395	57	0.144	162	20	0.123	234	39	0.167
ag	5:90889927:+	Alb	2	0	NA	2	0	NA	1	0	NA	1	0	NA	NA	NA	NA	NA	NA	NA	481	108	0.225	201	28	0.139	293	61	0.208
ag	5:113516854:-	2900026A02Rik	1	1	1	NA	NA	NA	NA	NA	NA	4	1	0.25	3	0	NA	NA	NA	NA	6	2	0.333	7	2	0.286	3	2	0.667
ag	5:136385212:-	Ywhag	533	19	0.036	466	27	0.058	265	6	0.023	120	16	0.133	82	19	0.232	94	6	0.064	54	2	0.037	41	4	0.098	33	3	0.091
ag	5:143145189:+	Wipi2	11	3	0.273	13	2	0.154	19	2	0.105	31	3	0.097	26	2	0.077	21	0	NA	13	2	0.154	11	2	0.182	9	0	NA
ct	6:66985304:-	Gadd45a	4	0	NA	15	3	0.2	4	0	NA	88	20	0.227	35	9	0.257	77	19	0.247	8	1	0.125	6	3	0.5	7	2	0.286
ag	6:91708161:+	Slc6a6	61	4	0.066	82	2	0.024	84	1	0.012	80	6	0.075	81	7	0.086	31	2	0.065	40	1	0.025	47	1	0.021	17	0	NA
ag	6:124765410:-	Usp5	68	1	0.015	71	0	NA	22	0	NA	111	8	0.072	67	8	0.119	46	5	0.109	32	1	0.031	20	1	0.05	13	0	NA
ag	7:30008098:-	Kcnk6	5	0	NA	4	0	NA	2	1	0.5	16	2	0.125	14	3	0.214	14	3	0.214	3	2	0.667	1	0	NA	1	0	NA
ag	7:30008117:-	Kcnk6	5	1	0.2	3	0	NA	1	0	NA	10	2	0.2	18	4	0.222	7	2	0.286	2	0	NA	NA	NA	NA	NA	NA	NA
ag	7:86505655:+	Abhd2	7	0	NA	1	0	NA	3	0	NA	4	0	NA	20	2	0.1	7	1	0.143	17	2	0.118	23	4	0.174	10	3	0.3
ag	7:86505737:+	Abhd2	8	1	0.125	3	1	0.333	4	0	NA	9	1	0.111	18	1	0.056	5	0	NA	57	7	0.123	26	6	0.231	28	2	0.071
ag	7:87857276:-	Iqgap1	15	0	NA	44	4	0.091	21	0	NA	88	8	0.091	74	4	0.054	46	6	0.13	4	0	NA	3	0	NA	3	0	NA
ag	7:138129038:+	Htra1	80	10	0.125	102	13	0.127	102	11	0.108	19	5	0.263	12	1	0.083	6	0	NA	1	1	1	1	0	NA	1	1	1
ag	8:42003131:+	Slc7a2	NA	NA	NA	2	0	NA	NA	NA	NA	3	0	NA	2	0	NA	2	1	0.5	61	15	0.246	52	6	0.115	58	15	0.259
ag	8:42003144:+	Slc7a2	NA	NA	NA	2	0	NA	NA	NA	NA	3	0	NA	4	0	NA	3	1	0.333	68	7	0.103	83	5	0.06	48	4	0.083
ag	8:42003153:+	Slc7a2	NA	NA	NA	3	0	NA	NA	NA	NA	3	0	NA	4	0	NA	3	1	0.333	61	12	0.197	82	12	0.146	40	6	0.15
ag	8:42003165:+	Slc7a2	NA	NA	NA	4	0	NA	NA	NA	NA	3	0	NA	4	0	NA	3	0	NA	61	6	0.098	83	6	0.072	33	3	0.091
ag	8:42003218:+	Slc7a2	1	0	NA	4	0	NA	3	0	NA	2	0	NA	3	0	NA	1	1	1	81	27	0.333	100	17	0.17	52	11	0.212
ag	8:42005496:+	Slc7a2	3	0	NA	2	0	NA	3	0	NA	4	0	NA	4	0	NA	4	0	NA	45	3	0.067	80	7	0.087	29	2	0.069
ag	8:42005542:+	Slc7a2	3	0	NA	2	0	NA	1	1	1	4	0	NA	4	0	NA	4	0	NA	44	4	0.091	61	4	0.066	26	3	0.115
ag	8:42005546:+	Slc7a2	4	0	NA	2	0	NA	NA	NA	NA	3	0	NA	4	1	0.25	4	0	NA	42	9	0.214	66	15	0.227	26	3	0.115
ag	8:74747481:+	Fam32a	12	3	0.25	13	9	0.692	7	4	0.571	26	7	0.269	5	3	0.6	12	4	0.333	3	0	NA	4	1	0.25	2	1	0.5
ag	8:75006239:-	Slc35e1	17	0	NA	33	4	0.121	8	2	0.25	49	5	0.102	51	4	0.078	33	1	0.03	26	2	0.077	14	1	0.071	11	1	0.091
ag	8:75006569:-	Slc35e1	6	0	NA	18	1	0.056	13	2	0.154	25	3	0.12	31	5	0.161	8	3	0.375	14	1	0.071	9	0	NA	1	0	NA
ag	8:87366067:-	Calr	72	2	0.028	82	6	0.073	69	2	0.029	132	6	0.045	65	3	0.046	42	1	0.024	89	7	0.079	101	8	0.079	15	2	0.133
ct	8:87366372:-	Calr	20	2	0.1	17	3	0.176	10	2	0.2	35	9	0.257	23	3	0.13	27	2	0.074	43	7	0.163	22	3	0.136	23	2	0.087
ag	8:87435079:+	Dnase2a	2	1	0.5	1	1	1	1	0	NA	7	5	0.714	7	3	0.429	3	2	0.667	1	0	NA	3	0	NA	1	0	NA
ag	8:87480630:-	Rnaseh2a	NA	NA	NA	4	1	0.25	1	0	NA	8	2	0.25	8	4	0.5	6	3	0.5	4	1	0.25	2	0	NA	1	0	NA
ag	8:109409504:-	Chtf8	23	2	0.087	17	4	0.235	6	0	NA	28	3	0.107	39	5	0.128	23	3	0.13	6	1	0.167	3	1	0.333	4	0	NA
ag	8:116676183:+	Nudt7	5	0	NA	9	0	NA	5	0	NA	1	0	NA	NA	NA	NA	2	1	0.5	30	4	0.133	23	4	0.174	10	4	0.4
ag	8:127418022:-	Exoc8	10	2	0.2	12	4	0.333	7	2	0.286	6	3	0.5	5	3	0.6	2	0	NA	6	2	0.333	1	0	NA	3	0	NA
ag	8:127418084:-	Exoc8	9	4	0.444	15	7	0.467	6	1	0.167	10	6	0.6	7	4	0.571	6	3	0.5	7	6	0.857	4	2	0.5	1	1	1
ag	8:131028073:+	Nrp1	30	3	0.1	57	14	0.246	32	1	0.031	16	6	0.375	19	8	0.421	19	6	0.316	30	10	0.333	24	7	0.292	20	2	0.1
ag	9:21712279:-	Rab3d	43	1	0.023	42	1	0.024	30	0	NA	28	3	0.107	25	5	0.2	18	3	0.167	4	0	NA	11	1	0.091	3	0	NA
ag	9:54795579:+	Agphd1	3	1	0.333	2	1	0.5	3	2	0.667	NA	NA	NA	1	0	NA	NA	NA	NA	24	5	0.208	21	9	0.429	14	4	0.286
ag	9:65750379:+	2810417H13Rik	NA	NA	NA	NA	NA	NA	52	9	0.173	71	9	0.127	76	17	0.224	52	9	0.173	NA	NA	NA	NA	NA	NA	NA	NA	NA
ag	9:65750430:+	2810417H13Rik	NA	NA	NA	NA	NA	NA	54	9	0.167	56	14	0.25	61	7	0.115	54	9	0.167	NA	NA	NA	NA	NA	NA	NA	NA	NA
ct	9:72595415:+	Nedd4	170	10	0.059	288	22	0.076	266	21	0.079	88	0	NA	64	0	NA	56	0	NA	54	0	NA	65	4	0.062	39	1	0.026
ag	9:72861373:+	Ccpg1	6	1	0.167	19	4	0.211	17	7	0.412	8	1	0.125	7	2	0.286	22	8	0.364	12	6	0.5	12	6	0.5	5	3	0.6
ag	9:72945035:+	Rab27a	4	0	NA	1	0	NA	NA	NA	NA	29	2	0.069	41	9	0.22	13	2	0.154	1	0	NA	NA	NA	NA	NA	NA	NA
ag	9:79603298:-	Cox7a2	63	9	0.143	69	7	0.101	51	7	0.137	57	12	0.211	23	3	0.13	36	3	0.083	45	6	0.133	50	9	0.18	21	3	0.143
ct	9:79617629:-	Tmem30a	27	9	0.333	26	6	0.231	21	5	0.238	43	2	0.047	20	1	0.05	28	0	NA	35	10	0.286	37	6	0.162	20	3	0.15
ag	9:102988386:+	Slco2a1	4	0	NA	5	0	NA	6	0	NA	7	0	NA	5	0	NA	4	0	NA	28	5	0.179	19	4	0.211	24	2	0.083
ag	9:103111211:-	Trf	36	3	0.083	36	5	0.139	31	3	0.097	2	0	NA	NA	NA	NA	NA	NA	NA	85	10	0.118	100	8	0.08	73	7	0.096
ag	9:106142247:-	Alas1	NA	NA	NA	NA	NA	NA	NA	NA	NA	NA	NA	NA	49	12	0.245	8	0	0	28	2	0.071	3	1	0.333	29	2	0.069
ag	9:123430036:+	Limd1	24	3	0.125	19	2	0.105	18	4	0.222	42	5	0.119	33	4	0.121	23	6	0.261	11	1	0.091	9	2	0.222	5	0	NA
ag	X:35773493:-	Lamp2	70	5	0.071	95	3	0.032	87	5	0.057	90	5	0.056	74	7	0.095	71	9	0.127	112	3	0.027	95	17	0.179	65	2	0.031
ag	X:53840820:-	Mmgt1	26	15	0.577	54	29	0.537	46	21	0.457	14	7	0.5	12	7	0.583	8	4	0.5	7	5	0.714	6	5	0.833	5	4	0.8
ag	X:53840821:-	Mmgt1	26	7	0.269	54	13	0.241	47	3	0.064	14	2	0.143	12	3	0.25	8	1	0.125	7	1	0.143	7	3	0.429	5	0	NA
ag	X:71471989:-	Flna	19	11	0.579	13	7	0.538	23	11	0.478	16	13	0.812	NA	NA	NA	42	14	0.333	2	1	0.5	20	9	0.45	NA	NA	NA
ag	X:71472201:-	Flna	75	25	0.333	60	21	0.35	43	9	0.209	243	51	0.21	295	52	0.176	171	43	0.251	6	1	0.167	10	3	0.3	2	1	0.5
ct	X:106355759:+	Sh3bgrl	56	8	0.143	76	11	0.145	52	4	0.077	36	0	NA	15	0	NA	24	0	NA	23	4	0.174	26	1	0.038	11	0	NA
ct	X:135614175:-	Serpina7	NA	NA	NA	NA	NA	NA	NA	NA	NA	NA	NA	NA	NA	NA	NA	NA	NA	NA	13	5	0.385	15	4	0.267	6	2	0.333
ag	X:147420065:-	Gnl3l	6	1	0.167	10	2	0.2	7	2	0.286	13	2	0.154	16	3	0.188	6	3	0.5	2	0	NA	2	0	NA	NA	NA	NA
ag	X:147420066:-	Gnl3l	7	1	0.143	9	2	0.222	7	2	0.286	13	6	0.462	15	5	0.333	6	3	0.5	2	1	0.5	2	0	NA	NA	NA	NA
ag	X:156411881:+	Sh3kbp1	25	0	NA	31	0	NA	18	1	0.056	42	5	0.119	25	3	0.12	27	3	0.111	NA	NA	NA	1	1	1	2	1	0.5
ag	X:160415893:-	Car5b	116	24	0.207	215	69	0.321	167	19	0.114	5	0	NA	2	0	NA	NA	NA	NA	1	0	NA	1	0	NA	1	0	NA
ag	X:160415964:-	Car5b	121	95	0.785	192	133	0.693	152	92	0.605	4	2	0.5	5	2	0.4	2	0	NA	3	2	0.667	NA	NA	NA	1	1	1
ag	X:160415965:-	Car5b	121	60	0.496	194	91	0.469	152	45	0.296	4	1	0.25	5	2	0.4	2	0	NA	2	1	0.5	NA	NA	NA	1	0	NA

## Sheet: Sheet1
Ugt1a6b	intron	5		1236;pos	535,Ugt1a6a	intron	5		1236;pos	535,Ugt1a7c	intron	4		1236;pos	535,Ugt1a10	intron	4		1236;pos	535,Ugt1a5	intron	4		1236;pos	535,Ugt1a2	intron	4		1236;pos	535,Ugt1a1	intron	4		1236;pos	535,Ugt1a9	intron	4		1236;pos	535,F
Heatr7b1	intron	42		12;pos	299,Hjurp	3utr		748;pos	5574,
Ppp1r15b	3utr		2256;pos	656,
Ppp1r15b	3utr		2239;pos	673,
Ppp1r15b	3utr		1790;pos	1122,
Rnasel	3utr		1679;pos	250,
BC013529	3utr		249;pos	281,
Serinc1	3utr		207;pos	1172,
Lims1	3utr		1032;pos	2088,
Igf1	3utr		5340;pos	1006,Igf1	3utr		5340;pos	1006,Igf1	3utr		5340;pos	972,Igf1	3utr		5340;pos	972,
Dcn	3utr		250;pos	245,
Dcn	3utr		210;pos	285,
Dcn	3utr		118;pos	377,
Mmp19	3utr		1391;pos	332,Mmp19	3utr		1391;pos	332,
Mmp19	3utr		282;pos	1441,1110012D08Rik	3utr		506;pos	553,Mmp19	3utr		282;pos	1441,
Mmp19	3utr		255;pos	1468,1110012D08Rik	3utr		533;pos	526,Mmp19	3utr		255;pos	1468,
Mmp19	3utr		252;pos	1471,1110012D08Rik	3utr		536;pos	523,Mmp19	3utr		252;pos	1471,
Sfi1	exon	2		3512;CodonPos	3,
Sfi1	intron	19		3033;pos	4108,
Sfi1	intron	23		187;pos	1863,
Actr2	3utr		973;pos	1410,
Myh2	3utr		3;pos	124,
Ovca2	3utr		401;pos	1550,
Ovca2	3utr		402;pos	1549,
Ovca2	3utr		489;pos	1462,
Rpa1	3utr		301;pos	745,Rpa1	3utr		301;pos	745,
Rpa1	3utr		318;pos	728,Rpa1	3utr		318;pos	728,
Rpa1	3utr		319;pos	727,Rpa1	3utr		319;pos	727,
Rpa1	3utr		325;pos	721,Rpa1	3utr		325;pos	721,
Rpa1	3utr		334;pos	712,Rpa1	3utr		334;pos	712,
Rpa1	3utr		359;pos	687,Rpa1	3utr		359;pos	687,
Rpa1	3utr		363;pos	683,Rpa1	3utr		363;pos	683,
Rpa1	3utr		372;pos	674,Rpa1	3utr		372;pos	674,
Rpa1	3utr		741;pos	305,Rpa1	3utr		741;pos	305,
Rpa1	3utr		756;pos	290,Rpa1	3utr		756;pos	290,
Rpa1	3utr		773;pos	273,Rpa1	3utr		773;pos	273,
Rpa1	3utr		781;pos	265,Rpa1	3utr		781;pos	265,
Abhd15	3utr		271;pos	1515,
Slfn5	3utr		2284;pos	861,
Slfn5	3utr		1622;pos	1523,
Slfn5	3utr		1394;pos	1751,
Slfn5	3utr		1216;pos	1929,
Slfn5	3utr		1190;pos	1955,
Slfn5	3utr		1164;pos	1981,
Arhgdia	3utr		1856;pos	140,
Apob	exon	26		6534;CodonPos	1,
Pum2	3utr		2312;pos	548,Pum2	5utr		680;pos	2313,Pum2	3utr		2312;pos	548,Pum2	3utr		2312;pos	548,Pum2	3utr		2312;pos	548,Pum2	3utr		2312;pos	548,
Actr10	exon	13		1235;CodonPos	3,
Calm1	3utr		2620;pos	757,
Fbln5	3utr		3921;pos	256,
Serpina1d	exon	4		172;CodonPos	2,
Akr1c6	3utr		184;pos	154,
Flnb	exon	41		6853;CodonPos	2,
Adk	3utr		488;pos	119,
Samd8	3utr		1014;pos	4469,
Tkt	3utr		1128;pos	81,
Ankrd28	3utr		611;pos	1394,
Ankrd28	3utr		614;pos	1391,
Ankrd28	3utr		647;pos	1358,
Ankrd28	3utr		648;pos	1357,
Ankrd28	3utr		650;pos	1355,
Ankrd28	3utr		908;pos	1097,
Mapk1ip1l	3utr		3118;pos	549,
Mapk1ip1l	3utr		3113;pos	554,
Mapk1ip1l	3utr		3112;pos	555,
Ndrg2	3utr		16;pos	853,Ndrg2	3utr		16;pos	853,
Tox4	3utr		1280;pos	967,
Fndc3a	3utr		1551;pos	663,
Sepp1	3utr		445;pos	352,Sepp1	3utr		445;pos	352,Sepp1	3utr		445;pos	352,
Lifr	intron	15		247;pos	502,Lifr	intron	16		247;pos	3,
Npr3	3utr		1095;pos	4185,Npr3	3utr		1095;pos	4185,
Azin1	exon	2		1098;CodonPos	1,Azin1	exon	2		1098;CodonPos	1,
Azin1	exon	2		1097;CodonPos	3,Azin1	exon	2		1097;CodonPos	3,
Ly6d	3utr		187;pos	113,
Apobec3	3utr		882;pos	177,Apobec3	3utr		882;pos	177,
Tef	intron	2		4023;pos	1916,Tef	intron	2		4023;pos	1916,
Atxn10	3utr		626;pos	286,
Comt1	3utr		647;pos	308,Comt1	3utr		647;pos	308,Comt1	3utr		647;pos	308,
Klhl24	3utr		3996;pos	641,
Rnf168	3utr		1086;pos	1026,
Fstl1	3utr		752;pos	1837,
Gbe1	3utr		368;pos	302,
Cxadr	intron	7		1223;pos	21618,Cxadr	3utr		3157;pos	1141,
App	3utr		70;pos	818,
App	3utr		425;pos	463,
C2cd2	3utr		1998;pos	2148,
Tapbp	3utr		736;pos	402,Tapbp	3utr		736;pos	402,
Tapbp	3utr		561;pos	577,Tapbp	3utr		561;pos	577,
Tapbp	3utr		557;pos	581,Tapbp	3utr		557;pos	581,
AU023871	3utr		1377;pos	267,
H2-Q10	3utr		9;pos	985,
Mdc1	3utr		1930;pos	109,
Mdc1	3utr		1050;pos	989,
Vapa	3utr		593;pos	42,
Ik	exon	14		1266;CodonPos	1,
Dcp2	3utr		266;pos	6973,
C330018D20Rik	3utr		1107;pos	802,
Isoc1	3utr		1320;pos	338,
Fech	3utr		312;pos	1221,
Fech	3utr		346;pos	1187,
Malt1	3utr		1715;pos	651,
Cep76	3utr		575;pos	1262,
Cep76	3utr		579;pos	1258,
Cep76	3utr		1339;pos	498,
Atl3	3utr		3358;pos	1213,Atl3	3utr		3358;pos	1213,
Atl3	3utr		493;pos	4078,Atl3	3utr		493;pos	4078,
Cybasc3	3utr		1192;pos	89,
Mpeg1	3utr		1023;pos	919,
Mpeg1	3utr		596;pos	1346,
Lipa	3utr		75;pos	1589,Lipa	3utr		75;pos	1589,
Scd1	3utr		1139;pos	2329,
Scd1	3utr		1241;pos	2227,
Scd1	3utr		1973;pos	1495,
Sfxn2	3utr		1741;pos	387,
Sfxn2	3utr		1725;pos	403,
Slk	3utr		1112;pos	2039,Slk	3utr		1112;pos	2039,
Celf2	3utr		5058;pos	2330,Celf2	3utr		5058;pos	2330,Celf2	3utr		5058;pos	2330,Celf2	3utr		5058;pos	2330,Celf2	3utr		5058;pos	2330,Celf2	3utr		5058;pos	2330,Celf2	3utr		5058;pos	2330,Celf2	3utr		5058;pos	2330,
Fnbp1	intron	1		2099;pos	2049,Fnbp1	intron	1		2099;pos	2049,Fnbp1	intron	1		2099;pos	2049,Fnbp1	intron	1		2099;pos	2049,
Fnbp1	intron	1		1971;pos	2177,Fnbp1	intron	1		1971;pos	2177,Fnbp1	intron	1		1971;pos	2177,Fnbp1	intron	1		1971;pos	2177,
Ube2l6	3utr		329;pos	515,
Celf1	intron	14		2468;pos	697,Celf1	intron	13		2468;pos	697,
Oip5	3utr		549;pos	238,
Oip5	3utr		551;pos	236,
Wdr76	3utr		1597;pos	699,
Wdr76	3utr		1221;pos	1075,
Wdr76	3utr		465;pos	1831,
Patl2	intron	16		26355;pos	22585,B2m	3utr		342;pos	1079,
Patl2	intron	16		26308;pos	22632,B2m	3utr		295;pos	1126,
Patl2	intron	16		26291;pos	22649,B2m	3utr		278;pos	1143,
Patl2	intron	16		26193;pos	22747,B2m	3utr		180;pos	1241,
2010106G01Rik	3utr		1062;pos	2748,
2010106G01Rik	3utr		1064;pos	2746,
2010106G01Rik	3utr		1069;pos	2741,
2010106G01Rik	3utr		1115;pos	2695,
Cds2	3utr		2408;pos	4347,
Cds2	3utr		2407;pos	4348,
Cds2	3utr		2386;pos	4369,
Cds2	3utr		2385;pos	4370,
Cds2	3utr		2372;pos	4383,
Cds2	3utr		2168;pos	4587,
Cds2	3utr		2161;pos	4594,
Cds2	3utr		2157;pos	4598,
Cds2	3utr		1335;pos	5420,
Sdc4	3utr		1644;pos	195,
Tpd52l2	3utr		1351;pos	230,
Fabp4	exon	3		142;CodonPos	2,
Ythdf3	5utr		991;pos	2090,Ythdf3	3utr		2089;pos	967,Ythdf3	3utr		2089;pos	967,
Rnf13	3utr		163;pos	1219,
2810407C02Rik	3utr		2721;pos	531,
Kpna4	3utr		493;pos	1375,
Bche	3utr		1741;pos	2367,
Bche	3utr		2855;pos	1253,
Mrpl24	intron	1		1746;pos	367,
Gabpb2	3utr		1735;pos	5167,Gabpb2	3utr		1735;pos	5167,
Gabpb2	3utr		1793;pos	5109,Gabpb2	3utr		1793;pos	5109,
Gabpb2	3utr		2173;pos	4729,Gabpb2	3utr		2173;pos	4729,
6330549D23Rik	intron	1		5143;pos	15188,Lix1l	3utr		1037;pos	408,
Fmo5	3utr		3301;pos	158,Fmo5	3utr		3301;pos	158,Fmo5	3utr		3301;pos	158,
Nras	3utr		1824;pos	2640,
Agl	3utr		4085;pos	734,
Agl	3utr		4098;pos	721,
Agl	3utr		4682;pos	137,
Rab2a	3utr		198;pos	1000,
Gne	3utr		2752;pos	290,
Zyg11b	3utr		3121;pos	5128,
Zyg11b	3utr		3181;pos	5068,
Rnf11	3utr		1193;pos	201,
Tmem69	3utr		1356;pos	150,
Rbbp4	3utr		2791;pos	201,
Rbbp4	3utr		2884;pos	108,
Rbbp4	3utr		2886;pos	106,
Rbbp4	3utr		2887;pos	105,
Epb4.1	3utr		1021;pos	2063,Epb4.1	3utr		1018;pos	2063,Epb4.1	3utr		1018;pos	2063,
Fgr	3utr		1362;pos	176,
Padi2	3utr		974;pos	1687,
Slc35e2	3utr		1437;pos	3154,
Sdf4	3utr		2944;pos	715,
Cd36	3utr		1447;pos	2585,Cd36	3utr		1447;pos	2585,Cd36	3utr		1447;pos	2585,Cd36	3utr		1447;pos	2585,Cd36	3utr		1447;pos	2585,
Igfbp7	exon	5		283;CodonPos	2,Igfbp7	exon	6		283;CodonPos	2,
Igfbp7	exon	5		231;CodonPos	1,Igfbp7	exon	6		231;CodonPos	1,
Ugt2b35	3utr		1387;pos	348,
Igj	3utr		915;pos	588,
Alb	5utr		11;pos	35,
Alb	5utr		12;pos	34,
2900026A02Rik	3utr		1509;pos	4585,
Ywhag	3utr		963;pos	1653,
Wipi2	3utr		135;pos	2262,
Gadd45a	3utr		214;pos	349,
Slc6a6	3utr		894;pos	3109,
Usp5	3utr		373;pos	174,
Kcnk6	3utr		1151;pos	1957,
Kcnk6	3utr		1170;pos	1938,
Abhd2	3utr		832;pos	612,
Abhd2	3utr		750;pos	694,
Iqgap1	3utr		807;pos	1442,
Htra1	3utr		133;pos	392,
Slc7a2	3utr		4293;pos	1242,Slc7a2	3utr		4293;pos	1242,
Slc7a2	3utr		4280;pos	1255,Slc7a2	3utr		4280;pos	1255,
Slc7a2	3utr		4271;pos	1264,Slc7a2	3utr		4271;pos	1264,
Slc7a2	3utr		4259;pos	1276,Slc7a2	3utr		4259;pos	1276,
Slc7a2	3utr		4206;pos	1329,Slc7a2	3utr		4206;pos	1329,
Slc7a2	3utr		1928;pos	3607,Slc7a2	3utr		1928;pos	3607,
Slc7a2	3utr		1882;pos	3653,Slc7a2	3utr		1882;pos	3653,
Slc7a2	3utr		1878;pos	3657,Slc7a2	3utr		1878;pos	3657,
Fam32a	3utr		193;pos	1331,
Slc35e1	3utr		4345;pos	1426,
Slc35e1	3utr		4675;pos	1096,
Calr	3utr		80;pos	479,
Calr	3utr		385;pos	174,
Dnase2a	3utr		281;pos	147,
Rnaseh2a	3utr		121;pos	992,
Chtf8	3utr		1741;pos	698,
Nudt7	3utr		15;pos	266,Nudt7	3utr		22;pos	266,
Exoc8	3utr		3823;pos	1354,
Exoc8	3utr		3885;pos	1292,
Nrp1	3utr		1300;pos	1358,
Rab3d	3utr		324;pos	2649,
Agphd1	3utr		2152;pos	1245,
2810417H13Rik	3utr		979;pos	968,Trip4	intron	15		5867;pos	4044,
2810417H13Rik	3utr		928;pos	1019,Trip4	intron	15		5816;pos	4095,
Nedd4	3utr		2240;pos	379,
Ccpg1	intron	8		574;pos	1767,Ccpg1	3utr		372;pos	199,
Rab27a	3utr		364;pos	1771,
Cox7a2	3utr		250;pos	56,
Tmem30a	3utr		878;pos	1464,
Slco2a1	3utr		1793;pos	176,
Trf	3utr		5;pos	163,
Alas1	intron	6		1201;pos	200,
Limd1	3utr		632;pos	1674,
Lamp2	3utr		807;pos	1396,Lamp2	intron	1		3952;pos	14745,
Mmgt1	3utr		2131;pos	1501,
Mmgt1	3utr		2132;pos	1500,
Flna	intron	5		212;pos	316,
Flna	exon	6		6997;CodonPos	2,
Sh3bgrl	3utr		2047;pos	257,
Serpina7	3utr		379;pos	649,
Gnl3l	3utr		2389;pos	582,Gnl3l	3utr		2389;pos	582,
Gnl3l	3utr		2390;pos	581,Gnl3l	3utr		2390;pos	581,
Sh3kbp1	3utr		1968;pos	782,Sh3kbp1	3utr		1968;pos	782,Sh3kbp1	3utr		1968;pos	782,
Car5b	3utr		1137;pos	1230,
Car5b	3utr		1208;pos	1159,
Car5b	3utr		1209;pos	1158,
